# Supplementary material
Source: PubMed Central journal article supplement (PMC6629164)
Supplement: jciinsight-4-127807-s136.pdf [file jciinsight-4-127807-s136.pdf]

# Supplementary data

## Table of contents

|                |                                                                           |
|----------------|---------------------------------------------------------------------------|
| <b>Figures</b> |                                                                           |
| Figure S1      | Phenotype of terminal effector cells                                      |
| Figure S2      | Transcription factor expression in CD4 memory T cells                     |
| Figure S3      | Gating strategy for Myeloid cells                                         |
| Figure S4      | Phenotype of Myeloid and NK cells                                         |
| Figure S5      | B cells in HD, MGUS, MM                                                   |
| Figure S6      | Top pathways identified by GSEA for T cells in cluster 2 vs cluster 3     |
| Figure S7      | Differentially expressed genes in cluster T3 (HDvsMM)                     |
| Figure S8      | Top pathways identified by GSEA for myeloid cells- MGUS vs MM             |
| Figure S9      | Differentially expressed genes in cluster M1 (HDvsMM)                     |
| Figure S10     | Top pathways identified by GSEA for myeloid cells associated with T cells |
| Figure S11     | Cartoon showing changes in T cells                                        |
| <b>Tables</b>  |                                                                           |
| Table S1       | Patient Characteristics                                                   |
| Table S2       | List of antibody clones used for CyTOF                                    |
| Table S3       | QC for scRNAseq                                                           |
| Table S4       | Top differential markers for cluster cell type determination              |

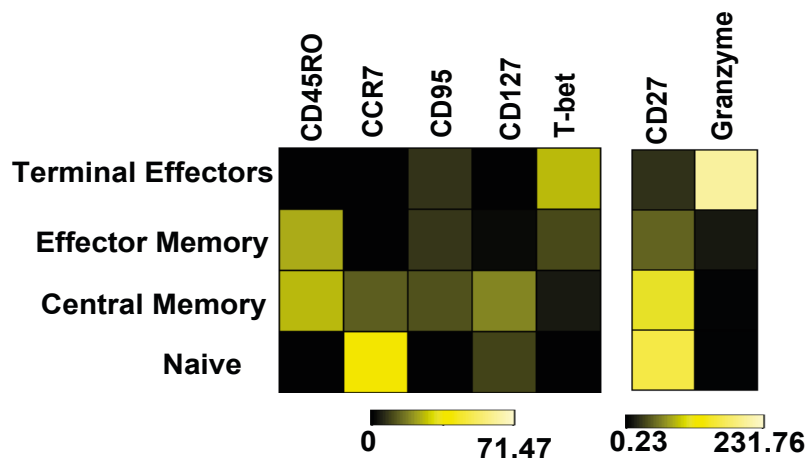

**FigS1:** Heatmap of CD45RO, CCR7, CD95, CD127, T-bet, CD27 and Granzyme B expression in terminal effectors, effector memory, central memory and naïve CD8 T cells (Representative data from MM patient).

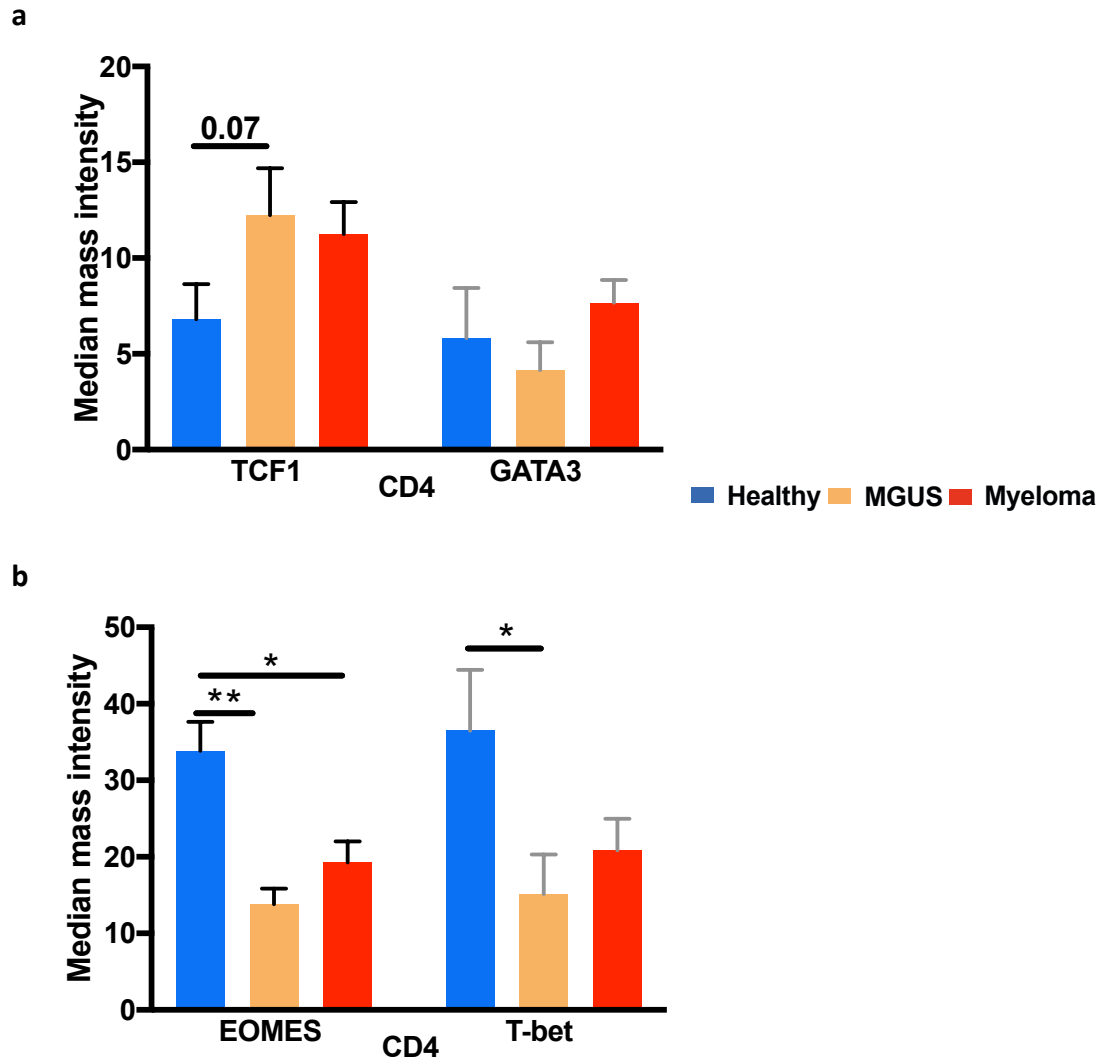

**Fig S2:** Expression of transcription factors in CD4 memory T cells in healthy donors and patients with MGUS & myeloma. **a.** Median mass intensity of TCF1 and GATA3. **b.** Median mass intensity of EOMES and T-bet.

\*  $p < 0.05$ , \*\*  $p < 0.01$

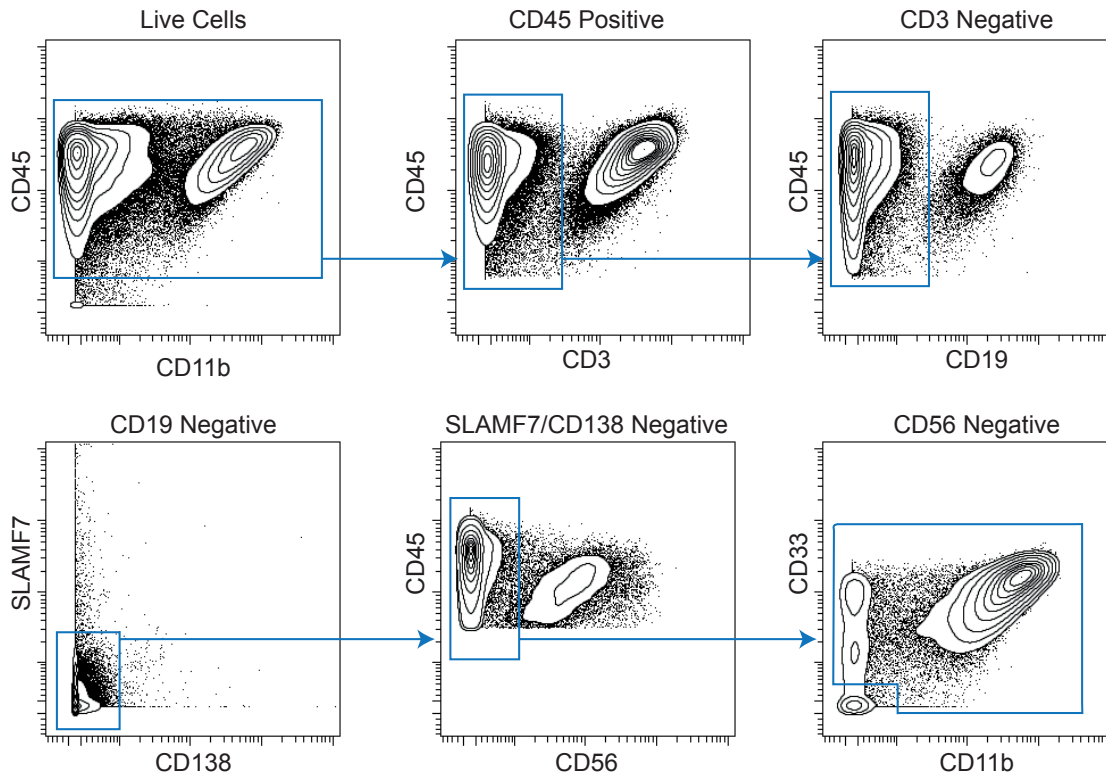

**Fig S3:** Gating strategy for myeloid cell analysis by CyTOF. Bulk myeloid cells were identified after excluding CD3, CD19, CD138, SLAMF7, CD56. Bulk myeloid cells were identified as CD33 or CD11b positive.

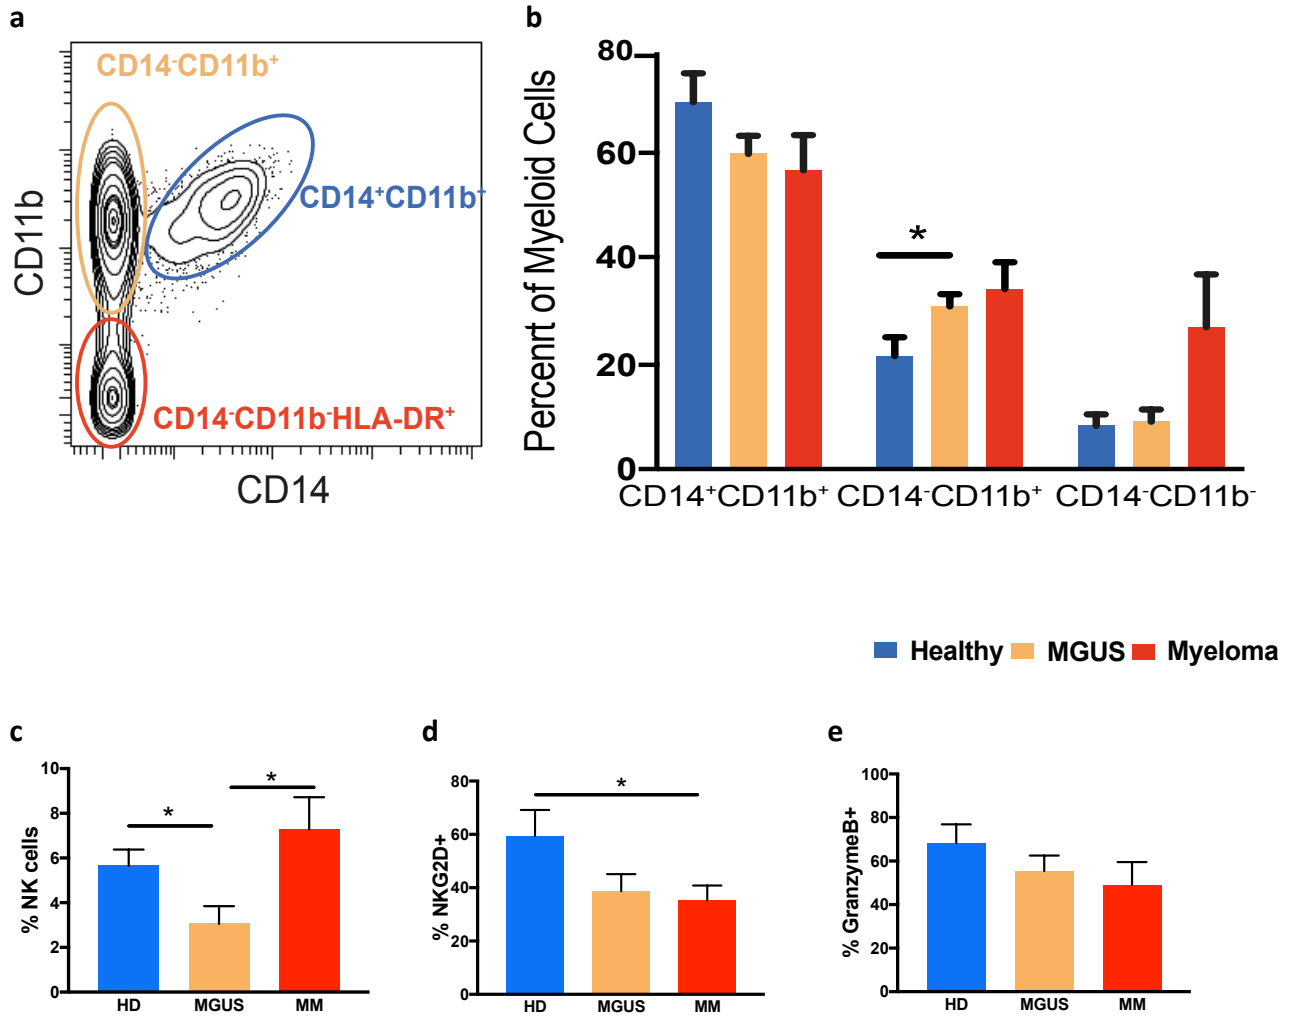

**Fig S4:** Characteristics of myeloid cells and NK cells in healthy, MGUS and MM. **a.** Biaxial gating of mass cytometry data for CD14<sup>+</sup>CD11b<sup>+</sup>, CD14-CD11b<sup>+</sup>, and CD14-CD11b<sup>-</sup> subsets from myeloid cells. **b.** Percent abundance of subsets from total myeloid cells. **c.** Percent of NK cells (from CD45<sup>hi</sup>) in healthy, MGUS and MM. **d, e.** Percent of CD56dim expressing NKG2D and Granzyme.

\* p<0.05

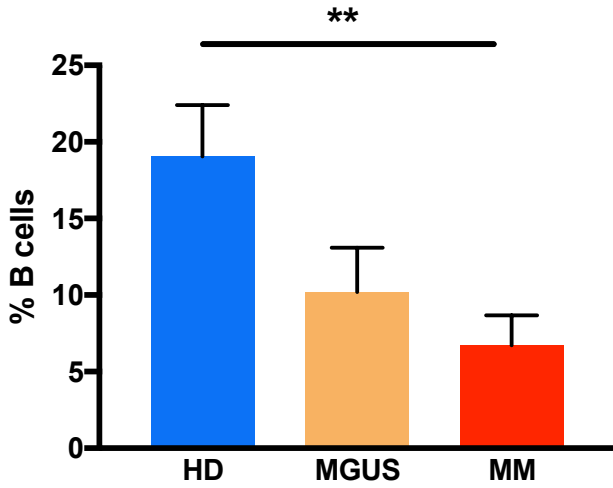

**Fig S5:** Figure shows B cells as percent of CD45+ lymphocytes in healthy donor, MGUS and MM patients as analyzed by mass cytometry.

\*\* p<0.01

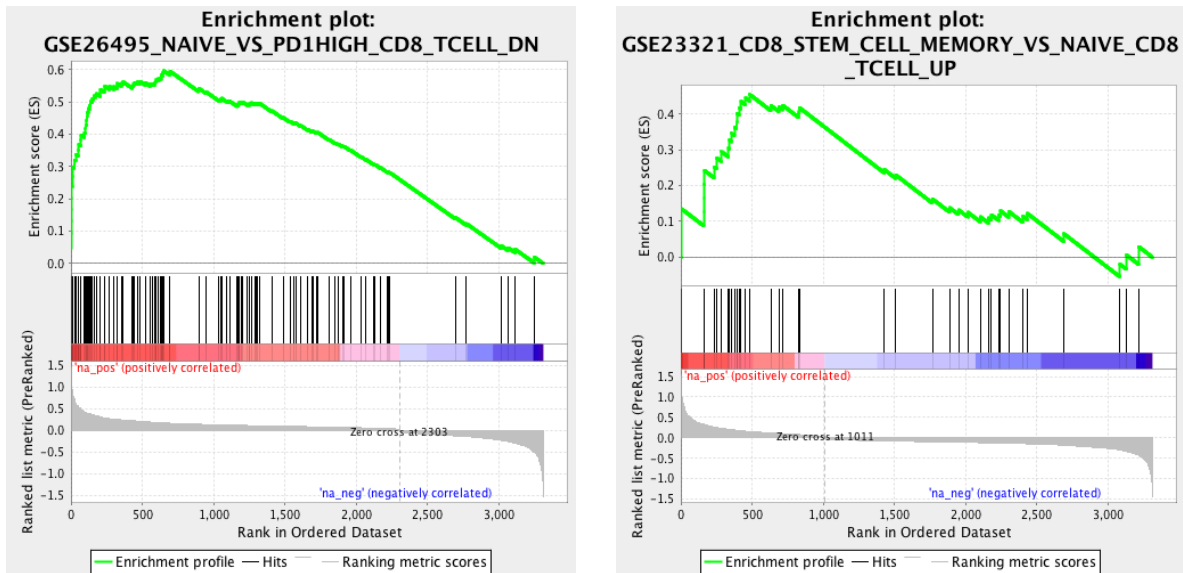

| Gene Set ID                     | Enriched Cluster | Description                                                     | Nominal p-value | PMID     |
|---------------------------------|------------------|-----------------------------------------------------------------|-----------------|----------|
| GSE26495<br>(shown above left)  | T3               | Genes down-regulated in naïve vs PD-1 high CD8 T cells          | p<0.001         | 21383243 |
| GSE23321<br>(shown above right) | T2               | Genes up-regulated in CD8 stem cell memory vs naïve CD8 T cells | p<0.001         | 21926977 |
| GSE45739                        | T3               | Genes down-regulated in unstimulated vs activated CD4 T cells   | p<0.001         | 23755101 |
| GSE3982                         | T3               | Genes up-regulated in effector vs central memory CD4 T cells    | p<0.001         | 16474395 |
| GSE11057                        | T3               | Genes down-regulated in naïve vs effector memory T cells        | p<0.001         | 19568420 |

**Fig S6:** GSEA pathway analysis of differential gene expression between cluster T3 (enriched in myeloma) and cluster T2 (enriched in MGUS) revealed enrichment of gene sets associated with stimulation, activation, and effector phenotype in cluster T3 relative to T2, and enrichment of a gene set associated with stem cell memory T cells in cluster T2 relative to T3. Gene signatures were obtained from the Molecular Signatures Database (Subramanian, Aravind, et al. "Gene set enrichment analysis: a knowledge-based approach for interpreting genome-wide expression profiles." *Proceedings of the National Academy of Sciences* 102.43 (2005): 15545-15550.).

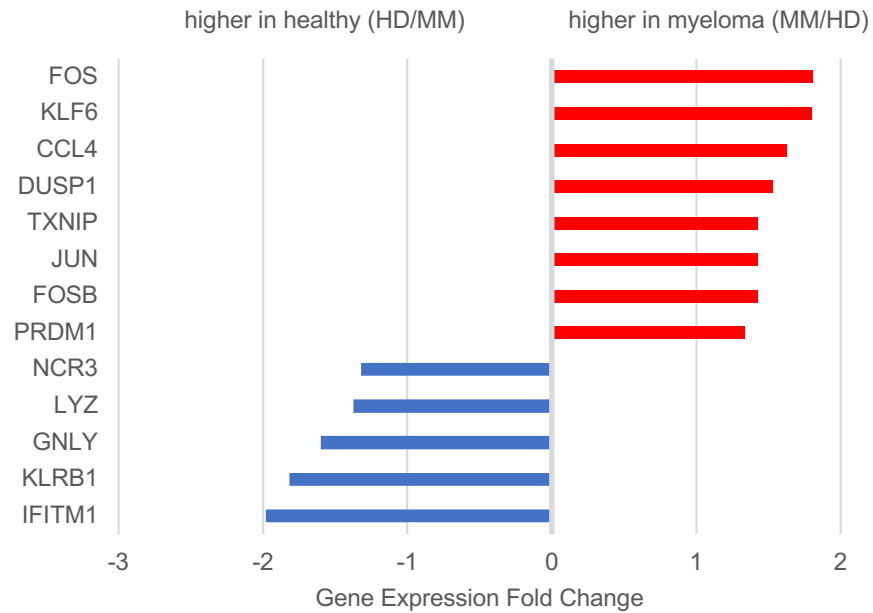

**Fig S7:** Gene expression fold-change of selected highly differentially expressed genes in T cell cluster T3 between myeloma and healthy samples. Red=increased in myeloma (fold change calculated as myeloma/healthy), blue=increased in healthy (fold change calculated as healthy/myeloma). Myeloma T cells exhibit enrichment in genes associated with exhaustion (PRDM1) and activation (CCL4) and downregulation of lysozyme and Granulysin (indicative of dysfunction).



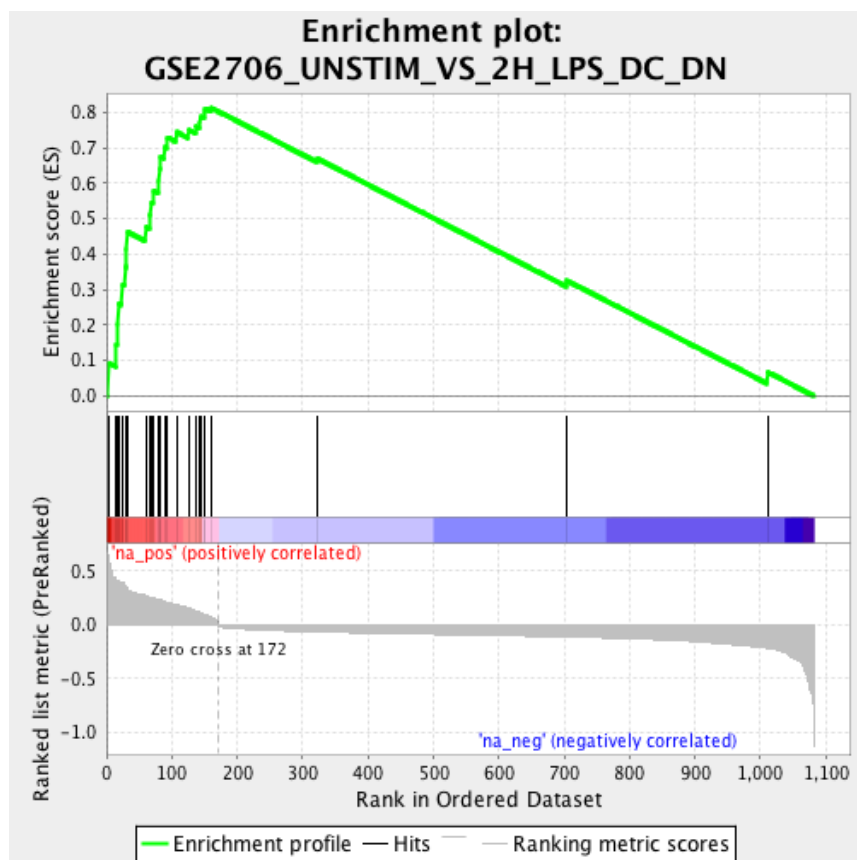

| Gene Set ID              | Description                                                                                           | Nominal p-value | PMID     |
|--------------------------|-------------------------------------------------------------------------------------------------------|-----------------|----------|
| GSE2706<br>(shown above) | Genes down-regulated in unstimulated vs LPS-stimulated dendritic cells                                | $p < 0.001$     | 15995707 |
| GSE22886                 | Genes down-regulated in unstimulated vs LPS-stimulated dendritic cells                                | $p < 0.001$     | 15789058 |
| GSE9988                  | Genes up-regulated in monocytes treated with anti-TREM1 and LPS vs monocytes treated with control IgG | $p < 0.001$     | 18292579 |
| GSE2706                  | Genes down-regulated in comparison of unstimulated vs R848-stimulated dendritic cells.                | $p < 0.001$     | 15995707 |

**Fig S8:** GSEA pathway analysis of differential gene expression between MGUS and myeloma myeloid cells revealed enrichment of gene sets associated with myeloid cell stimulation by TLR agonists in MGUS myeloid cells relative to myeloma myeloid cells. Gene signatures were obtained from the Molecular Signatures Database (Subramanian, Aravind, et al. "Gene set enrichment analysis: a knowledge-based approach for interpreting genome-wide expression profiles." *Proceedings of the National Academy of Sciences* 102.43 (2005): 15545-15550.).

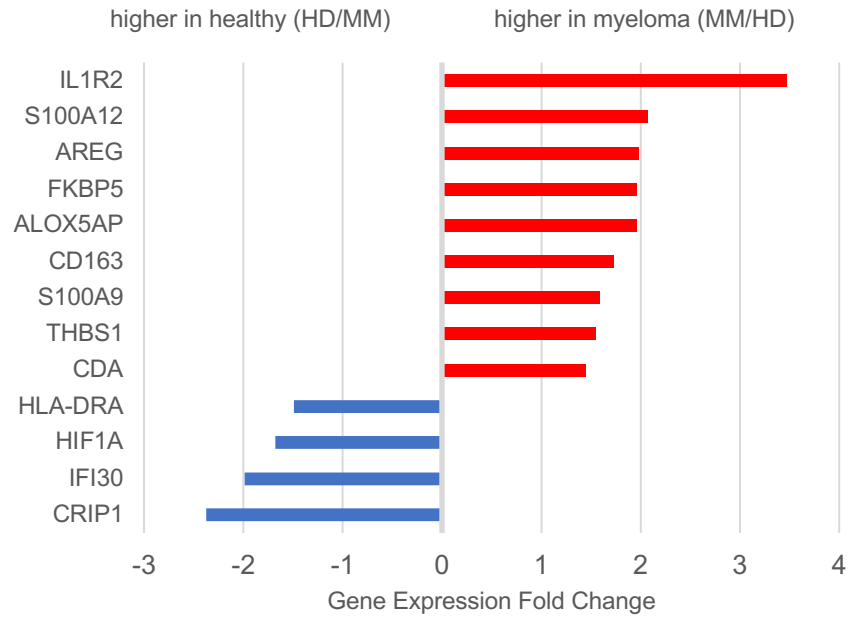

**Fig S9:** Selected highly differentially expressed genes in myeloid cluster M1 (monocytes) between myeloma and healthy samples. Red=increased in myeloma (fold change calculated as myeloma/healthy), blue=increased in healthy (fold change calculated as healthy/myeloma). Myeloma myeloid cells exhibit a more immune suppressive phenotype.

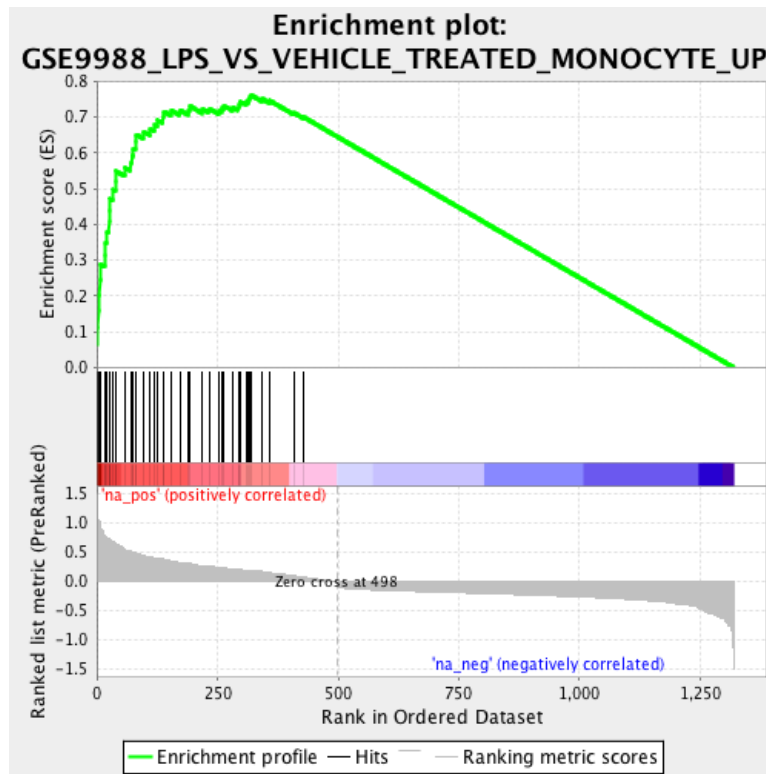

| Gene Set ID              | Description                                                                                           | Nominal p-value | PMID     |
|--------------------------|-------------------------------------------------------------------------------------------------------|-----------------|----------|
| GSE9988<br>(shown above) | Genes up-regulated in comparison of LPS-treated vs untreated monocytes                                | $p < 0.001$     | 18292579 |
| GSE2706                  | Genes down-regulated in comparison of unstimulated vs LPS-stimulated dendritic cells.                 | $p < 0.001$     | 15995707 |
| GSE9988                  | Genes up-regulated in monocytes treated with anti-TREM1 and LPS vs monocytes treated with control IgG | $p < 0.001$     | 18292579 |
| GSE2706                  | Genes down-regulated in comparison of unstimulated vs LPS- and R848-stimulated dendritic cells.       | $p < 0.001$     | 15995707 |

**Fig S10:** GSEA pathway analysis of differential gene expression between myeloid cells from patients with higher than mean proportion of cluster T2 (stem/resident-like T cells) and myeloid cells from all other patients revealed enrichment of gene sets associated with myeloid cell stimulation by TLR agonists in T2-enriched patient myeloid cells relative to other patient myeloid cells. Gene signatures were obtained from the Molecular Signatures Database (Subramanian, Aravind, et al. "Gene set enrichment analysis: a knowledge-based approach for interpreting genome-wide expression profiles." *Proceedings of the National Academy of Sciences* 102.43 (2005): 15545-15550.).

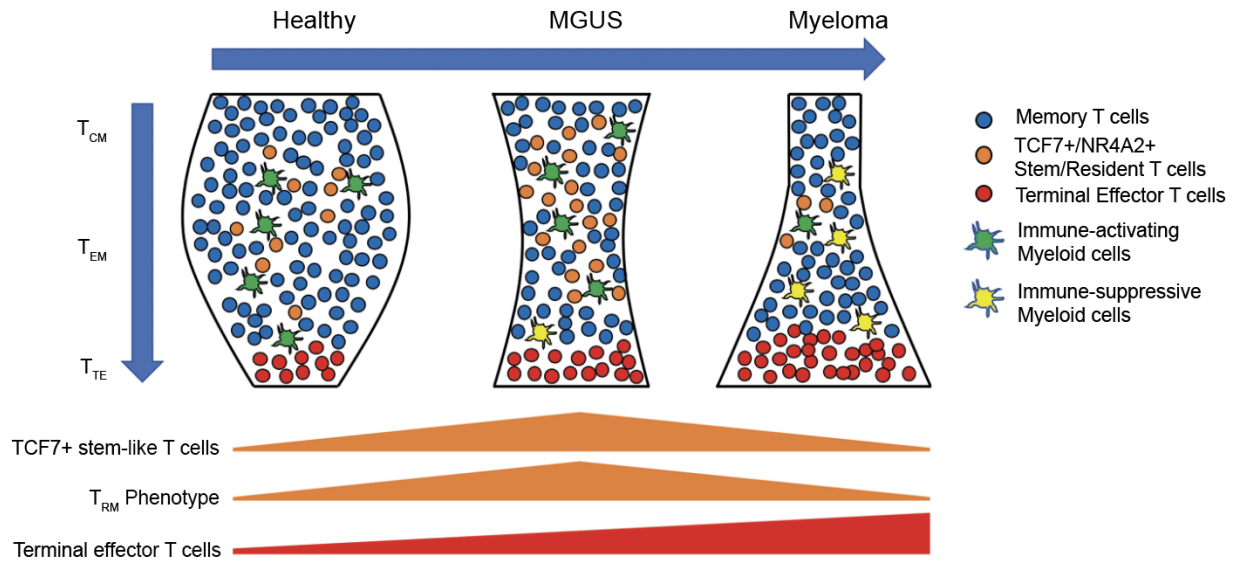

**Fig S11:** Schematic of immune cell population changes over myeloma disease progression. Left to right: disease progression from healthy to MGUS to myeloma. Top to bottom: T cell changes from central memory to effector memory to terminal effector. Compartment width corresponds to relative abundance of T cell type as seen by mass cytometry. Central memory and effector memory T cells decrease from healthy to MGUS to myeloma. Meanwhile, an increase in terminal effector T cells is noted as disease progresses, and myeloid cells trend toward an immune-suppressive phenotype. In MGUS, an increase in a stem/resident-like T cell population is seen relative to healthy and myeloma.

**Table S1:** Patient characteristics

|                       | MGUS (n=15) | MM (n=11) | Healthy (n=12) |
|-----------------------|-------------|-----------|----------------|
| Median Age            | 59 years    | 60 years  | 53.5 years     |
| Sex (Male: Female)    | 9:6         | 8:3       | 9:3            |
| M protein IgH isotype |             |           | NA             |
| IgG                   | 9           | 7         |                |
| IgA                   | 3           | 3         |                |
| IgM                   | 1           | -         |                |
| Light chain only      | 2           | 1         |                |
| M protein IgL isotype |             |           | NA             |
| Kappa                 | 11          | 7         |                |
| Lambda                | 4           | 4         |                |
| ISS Stage             | NA          |           | NA             |
| 1                     |             | 3         |                |
| 2                     |             | 3         |                |
| 3                     |             | 5         |                |
|                       |             |           |                |

NA: Not applicable

**Table S2:** List of antibodies and clones used for CyTOF analysis

|    | <b>Antibody</b> | <b>Clone</b> | <b>Supplier</b> |
|----|-----------------|--------------|-----------------|
| 1  | 41BB            | 4B4-1        | Biologend       |
| 2  | B7H3            | MIH42        | Biologend       |
| 3  | BDCA2           | 201A         | Fluidigm        |
| 4  | BDCA3           | 1A4          | Fluidigm        |
| 5  | c-Kit           | 104.D2       | Biologend       |
| 6  | CCR7            | G043H7       | Fluidigm        |
| 7  | CD103           | Ber-ACT8     | Fluidigm        |
| 8  | CD11b           | ICMF44       | Fluidigm        |
| 9  | CD11c           | Bu15         | Fluidigm        |
| 1  | CD123           | 6H6          | Fluidigm        |
| 11 | CD127           | A019D5       | Fluidigm        |
| 12 | CD138           | M15          | Biologend       |
| 13 | CD14            | RM052        | Fluidigm        |
| 14 | CD15            | W6D3         | Fluidigm        |
| 15 | CD155           | SKIL4        | Biologend       |
| 16 | CD16            | 3G8          | Fluidigm        |
| 17 | CD163           | GHI/61       | Fluidigm        |
| 18 | CD19            | HIB19        | Fluidigm        |
| 19 | CD200           | OX-104       | Fluidigm        |
| 20 | CD25            | 2A3          | Fluidigm        |
| 21 | CD27            | L128         | Fluidigm        |
| 22 | CD28            | CD28.2       | Fluidigm        |
| 23 | CD3             | UCHT1        | Fluidigm        |
| 24 | CD33            | WM53         | Fluidigm        |
| 25 | CD34            | 581          | Fluidigm        |
| 26 | CD38            | HIT2         | Fluidigm        |
| 27 | CD4             | RPA-T4       | Fluidigm        |
| 28 | CD45            | HI30         | Fluidigm        |
| 29 | CD45RO          | UCHL1        | Fluidigm        |

|    | <b>Antibody</b> | <b>Clone</b> | <b>Supplier</b> |
|----|-----------------|--------------|-----------------|
| 30 | CD56            | HCD56        | Biologend       |
| 31 | CD69            | FN50         | Fluidigm        |
| 32 | CD8             | RPA-T8       | Fluidigm        |
| 33 | CD80            | 2D10.4       | Fluidigm        |
| 34 | CD86            | IT2.2        | Fluidigm        |
| 35 | CD95            | DX2          | Fluidigm        |
| 36 | CTLA4           | 14D3         | Fluidigm        |
| 37 | CXCR4           | 12G5         | Fluidigm        |
| 38 | CXCR5           | RF8132       | Fluidigm        |
| 39 | DNAM-1          | TX25         | Biologend       |
| 40 | EOMES           | WD1928       | Ebioscience     |
| 41 | FOXP3           | PCH101       | Fluidigm        |
| 42 | Gata3           | TWAJ         | Fluidigm        |
| 43 | Granzyme        | GB11         | Fluidigm        |
| 44 | HLADR           | L243         | Fluidigm        |
| 45 | HVEM            | 122          | Biologend       |
| 46 | ICOS            | C398.4A      | Fluidigm        |
| 47 | Ki67            | Ki-67        | Fluidigm        |
| 48 | LAG3            | 11C3C65      | Fluidigm        |
| 49 | NKG2D           | OW72         | Fluidigm        |
| 50 | PD-L1           | CD274        | Fluidigm        |
| 51 | PD1             | EH12.2H7     | Fluidigm        |
| 52 | SLAMF7          | 162.1        | Biologend       |
| 53 | T-Bet           | 4B10         | Fluidigm        |
| 54 | TCF1            | 7F11A10      | Biologend       |
| 55 | TIGIT           | MBSA43       | Fluidigm        |
| 56 | TIM3            | F38-2E2      | Fluidigm        |
| 57 | VEGFR2          | 7D4-6        | Fluidigm        |

**Table S3.** Quality measures of scRNAseq

| <b>Cell Type</b>    | <b>Median Genes/Cell</b> | <b>Median UMI/Cell</b> | <b>Total Cells</b> |
|---------------------|--------------------------|------------------------|--------------------|
| <b>T cell</b>       | 978                      | 2985                   | 23891              |
| <b>B cell</b>       | 914                      | 2716                   | 6721               |
| <b>Myeloid cell</b> | 1220.5                   | 3719                   | 5864               |
| <b>pDC</b>          | 1901                     | 6028                   | 463                |
| <b>NK cell</b>      | 1029                     | 2411                   | 5667               |
| <b>All cells</b>    | 993                      | 2894                   | 42606              |

**Table S4. Highly Differentially Expressed Genes in Each Cluster**

| Cluster | Gene    | p_val     | avg_logFC  | pct.1 | pct.2 | p_val_adj |
|---------|---------|-----------|------------|-------|-------|-----------|
| T1      | LTB     | 0         | 0.91670112 | 0.929 | 0.455 | 0         |
|         | LDHB    | 0         | 0.89570163 | 0.878 | 0.46  | 0         |
|         | IL7R    | 0         | 0.85019827 | 0.683 | 0.2   | 0         |
|         | NOSIP   | 0         | 0.7984456  | 0.641 | 0.252 | 0         |
|         | CCR7    | 0         | 0.69293816 | 0.445 | 0.108 | 0         |
| T2      | TNFAIP3 | 0         | 1.47226662 | 0.672 | 0.145 | 0         |
|         | NR4A2   | 0         | 1.34552898 | 0.567 | 0.145 | 0         |
|         | JUNB    | 0         | 1.28180243 | 0.924 | 0.659 | 0         |
|         | TSPYL2  | 0         | 1.17838369 | 0.506 | 0.139 | 0         |
|         | PMAIP1  | 0         | 1.17048015 | 0.396 | 0.165 | 0         |
| T3      | GZMK    | 0         | 2.01806253 | 0.743 | 0.069 | 0         |
|         | DUSP2   | 0         | 1.44681637 | 0.706 | 0.196 | 0         |
|         | RGS1    | 0         | 1.2361968  | 0.346 | 0.105 | 0         |
|         | CCL5    | 0         | 1.2075621  | 0.919 | 0.305 | 0         |
|         | IL32    | 0         | 1.18695249 | 0.947 | 0.428 | 0         |
| T4      | GZMH    | 0         | 2.22063019 | 0.932 | 0.101 | 0         |
|         | FGFBP2  | 0         | 1.38394973 | 0.742 | 0.104 | 0         |
|         | CST7    | 0         | 1.33884052 | 0.923 | 0.23  | 0         |
|         | GZMA    | 0         | 1.20537669 | 0.883 | 0.222 | 0         |
|         | CTSW    | 0         | 1.13052979 | 0.84  | 0.269 | 0         |
| T5      | MALAT1  | 0         | 0.99344512 | 1     | 0.993 | 0         |
|         | FTL     | 0         | -1.1938078 | 0.584 | 0.937 | 0         |
|         | OAZ1    | 2.59E-300 | -0.8667835 | 0.331 | 0.804 | 5.30E-296 |
|         | GAPDH   | 5.11E-241 | -0.8839908 | 0.381 | 0.783 | 1.05E-236 |
|         | CLIC1   | 1.00E-230 | -0.7877622 | 0.125 | 0.548 | 2.05E-226 |
| T6      | IFI44L  | 4.71E-137 | 0.89033086 | 0.332 | 0.042 | 9.63E-133 |
|         | CD52    | 5.22E-50  | 0.65081849 | 0.94  | 0.704 | 1.07E-45  |
|         | IFITM1  | 1.19E-35  | 0.69539883 | 0.608 | 0.299 | 2.44E-31  |
|         | FLT3LG  | 7.36E-33  | 0.40774442 | 0.352 | 0.121 | 1.51E-28  |
|         | B2M     | 1.65E-31  | 0.31674443 | 1     | 0.986 | 3.38E-27  |
| NK1     | GNLY    | 0         | 2.34562861 | 0.973 | 0.256 | 0         |
|         | GZMB    | 0         | 2.24477348 | 0.937 | 0.146 | 0         |
|         | PRF1    | 0         | 2.21174003 | 0.9   | 0.144 | 0         |
|         | NKG7    | 0         | 2.08441301 | 0.994 | 0.339 | 0         |
|         | SPON2   | 0         | 2.02052901 | 0.76  | 0.078 | 0         |
| NK2     | CMC1    | 0         | 1.88307361 | 0.884 | 0.214 | 0         |
|         | XCL1    | 0         | 1.80742181 | 0.605 | 0.03  | 0         |
|         | XCL2    | 0         | 1.77593293 | 0.627 | 0.056 | 0         |
|         | KLRB1   | 0         | 1.70004243 | 0.846 | 0.203 | 0         |
|         | KLRC1   | 0.00E+00  | 1.6911337  | 0.527 | 0.036 | 0.00E+00  |
| NK3     | CCL3    | 0         | 2.28727795 | 0.54  | 0.099 | 0         |
|         | IFIT2   | 0.00E+00  | 1.81494611 | 0.372 | 0.045 | 0.00E+00  |
|         | EIF1    | 3.62E-297 | 1.01155107 | 0.999 | 0.955 | 7.41E-293 |



|     |           |           |            |       |       |           |
|-----|-----------|-----------|------------|-------|-------|-----------|
|     | SERTAD1   | 5.58E-289 | 1.20105923 | 0.409 | 0.07  | 1.14E-284 |
|     | H3F3B     | 3.64E-259 | 0.93357441 | 0.996 | 0.922 | 7.44E-255 |
| M1  | S100A8    | 0         | 4.86452505 | 0.986 | 0.187 | 0         |
|     | S100A9    | 0         | 4.76171825 | 0.99  | 0.19  | 0         |
|     | LYZ       | 0         | 4.10131896 | 0.998 | 0.154 | 0         |
|     | S100A12   | 0         | 3.5609141  | 0.868 | 0.032 | 0         |
|     | FCN1      | 0         | 2.79458947 | 0.917 | 0.046 | 0         |
| M2  | CST3      | 0         | 2.36702179 | 1     | 0.267 | 0         |
|     | HLA-DRB1  | 0         | 2.14617117 | 0.999 | 0.354 | 0         |
|     | FCER1A    | 0         | 2.09638709 | 0.866 | 0.019 | 0         |
|     | CLEC10A   | 0         | 1.54289516 | 0.697 | 0.006 | 0         |
|     | LGALS1    | 0.00E+00  | 1.37982972 | 0.996 | 0.382 | 0.00E+00  |
| M3  | LST1      | 0         | 2.86890711 | 0.997 | 0.183 | 0         |
|     | AIF1      | 0         | 2.48419896 | 0.997 | 0.209 | 0         |
|     | FCGR3A    | 0         | 2.27979303 | 0.968 | 0.118 | 0         |
|     | COTL1     | 0         | 2.16586742 | 0.985 | 0.361 | 0         |
|     | SAT1      | 0         | 2.16339283 | 0.995 | 0.432 | 0         |
| pDC | IRF8      | 0         | 2.46588222 | 0.946 | 0.1   | 0         |
|     | IRF7      | 0         | 2.19424903 | 0.922 | 0.094 | 0         |
|     | PLD4      | 0         | 2.13183986 | 0.948 | 0.055 | 0         |
|     | LILRA4    | 0         | 2.07313462 | 0.881 | 0.009 | 0         |
|     | ITM2C     | 0         | 2.07016956 | 0.955 | 0.15  | 0         |
| B1  | CD79A     | 0         | 2.22383476 | 0.882 | 0.054 | 0         |
|     | MS4A1     | 0         | 1.99457801 | 0.749 | 0.033 | 0         |
|     | CD74      | 0         | 1.98972013 | 0.999 | 0.639 | 0         |
|     | HLA-DRA   | 0         | 1.84891443 | 0.992 | 0.318 | 0         |
|     | LINC00926 | 0         | 1.58712633 | 0.594 | 0.009 | 0         |
| B2  | CD79B     | 0         | 2.71596402 | 0.976 | 0.195 | 0         |
|     | TCL1A     | 0         | 2.56900877 | 0.717 | 0.06  | 0         |
|     | VPREB3    | 0         | 2.22157959 | 0.814 | 0.067 | 0         |
|     | VPREB1    | 0         | 2.16787949 | 0.569 | 0.01  | 0         |
|     | SOX4      | 0         | 2.08853404 | 0.817 | 0.075 | 0         |
